# Supplementary material for: Optimization of Production–Living–Ecological Space in National Key Poverty-Stricken City of Southwest China
Source: MDPI journal article supplement (doi:10.3390/land11030411), 2022-03-11
Supplement: s1 [file s1]

---

## Supplement file

### Establishment of Model

#### Variables

Table S-1 Names, units and data sources of the variables included in the PLE space system dynamics model

| No. | Subsystem              | Variables                                                                         | Abbreviations | Units               |
|-----|------------------------|-----------------------------------------------------------------------------------|---------------|---------------------|
| 1   | Population<br>-Economy | Total Fixed-asset investment                                                      | FAI           | 10 <sup>9</sup> RMB |
| 2   |                        | Fixed-asset investment in primary industry                                        | FAIP          | 10 <sup>9</sup> RMB |
| 3   |                        | Fixed-asset investment in secondary industry and tertiary-industry                | FAII&T        | 10 <sup>9</sup> RMB |
| 4   |                        | The proportion of primary industry in total Fixed-asset investment                | PPI           | Dmnl                |
| 5   |                        | Gross Domestic Product                                                            | GDP           | 10 <sup>9</sup> RMB |
| 6   |                        | Gross product of primary industry                                                 | GDPP          | 10 <sup>9</sup> RMB |
| 7   |                        | Gross product of secondary industry                                               | GDPS          | 10 <sup>9</sup> RMB |
| 8   |                        | Gross product of tertiary-industry                                                | GDPT          | 10 <sup>9</sup> RMB |
| 9   |                        | Total population                                                                  | TP            | 10000 people        |
| 10  |                        | Population growth rate                                                            | PGR           | %                   |
| 11  |                        | Population growth quantity                                                        | PGQ           | 10000 people/Year   |
| 12  |                        | Rural population                                                                  | RP            | 10000 people        |
| 13  |                        | Urban population                                                                  | UP            | 10000 people        |
| 14  |                        | Urbanization rate                                                                 | UR            | Dmnl                |
| 15  | Land                   | Total land area                                                                   | TLA           | km <sup>2</sup>     |
| 16  |                        | Land area of Production space                                                     | LAP           | km <sup>2</sup>     |
| 17  |                        | Land area of Ecological space                                                     | LAE           | km <sup>2</sup>     |
| 18  |                        | Land area of living space                                                         | LAL           | km <sup>2</sup>     |
| 19  |                        | Construction land area                                                            | CLA           | km <sup>2</sup>     |
| 20  |                        | Land area of Agriculture Production space                                         | LAPA          | km <sup>2</sup>     |
| 21  |                        | Land area of Industry Production space                                            | LAPI          | km <sup>2</sup>     |
| 22  |                        | Land area growth quantity of Agriculture Production space per year                | LAGQPA        | km <sup>2</sup>     |
| 23  |                        | Garden area                                                                       | GA            | km <sup>2</sup>     |
| 24  |                        | Cultivated area                                                                   | CA            | km <sup>2</sup>     |
| 25  |                        | The proportion of cultivated land area of agricultural production space           | PCAPA         | Dmnl                |
| 26  |                        | Land area of urban living space                                                   | LALU          | km <sup>2</sup>     |
| 27  |                        | Land area of rural living space                                                   | LALR          | km <sup>2</sup>     |
| 28  |                        | The proportion of industrial production space land area of construction land area | PPICLA        | %                   |
| 29  |                        | Growth quantity of Construction land area per year                                | GQCLA         | km <sup>2</sup>     |

---

|    |                                                                                 |         |                                     |
|----|---------------------------------------------------------------------------------|---------|-------------------------------------|
| 30 | Gross product of primary industry per unit area of Agriculture Production space | GDPPA   | 10 <sup>9</sup> RMB/km <sup>2</sup> |
| 31 | Gross product of secondary industry per unit area of Industry Production space  | GDPI    | 10 <sup>9</sup> RMB/km <sup>2</sup> |
| 32 | Gross product of tertiary-industry per unit area of urban living space          | GDPLU   | 10 <sup>9</sup> RMB/km <sup>2</sup> |
| 33 | living area of Rural per capita                                                 | LALRPer | km <sup>2</sup> /10000 people       |

---

## Equations

(01)CA=LAPA\*PCAPA  
 (02)CLA= INTEG (GQCLA, 56.5182)  
 (03)FAI=IF THEN ELSE(GDP<650, (37.362\*EXP(0.0044\*GDP))\*1.01, (1624\*LN(GDP)-10032)\*1.07)  
 (04)"FAI&T"=FAI\*(1-PPI)  
 (05)FAIP=FAI\*PPI  
 (06)GA=LAPA\*(1-PCAPA)  
 (07)GDP=GDPP+GDPT+GDPS  
 (08)GDPLU = WITH LOOKUP (Time, ((2005,0)-(2020,10)],(2010,3.197),(2011,4.1285),(2012,4.97),(2013,6.091),(2014,6.202),(2015,6.041),(2016,5.8191),(2017,5.2616)))  
 (09)GDPP=GDPPA\*LAPA  
 (10)GDPPA = WITH LOOKUP (Time, ((2005,0)-(2020,0.1)],(2010,0.0123),(2011,0.0152),(2012,0.0188),(2013,0.021),(2014,0.0226),(2015,0.0234),(2016,0.0249),(2017,0.0258)))  
 (11) GDPI = WITH LOOKUP (Time, ((2005,0)-(2020,20)],(2010,11.1072),(2011,10.43),(2012,10.46),(2013,9.285),(2014,9.488),(2015,9.4138),(2016,9.821),(2017,11.2744))  
 (12)GDPS=GDPI\*LAPI  
 (13)GDPT=GDPLU\*LALU  
 (14)GQCLA=IF THEN ELSE("FAI&T"<535, (3.6268\*LN("FAI&T")-19.121) \*1.5, (7.0571\*LN ("FAI&T")-38.928)\*1.18)  
 (15)LAE=TLA-LAP-LAL  
 (16)LAGQPA=FAIP\*(-0.6885)+0.7059  
 (17)LAL=LALR+LALU  
 (18)LALR = WITH LOOKUP (RP, ((0,0)-(500,200)],(368.88,159.08),(375.1,158.04),(384.5,157.1),(390.6,156.25),(394.2,155.52),(397,154.87),(407,154.33),(415.186,153.89)))  
 (19)LALU=CLA-LAPI  
 (20)LAP=LAPA+LAPI  
 (21)LAPA= INTEG (LAGQPA,6016.95)  
 (22)LAPI=CLA\*PPICLA  
 (23)PCAPA=0.9989  
 (24)PGQ=PGR\*TP/100  
 (25)PGR = WITH LOOKUP (Time,((2009,0)-

---

(2040,10)],(2010,0.75321),(2011,0.71313),(2012,0.86858),(2013,0.84238),(2014,0.79821),(2015,0.82873),(2016,1.1324)))  
 (26)PPI = WITH LOOKUP (Time,([(2005,0)-(2020,1)],(2010,0.01197),(2011,0.014258),(2012,0.0077),(2013,0.01),(2014,0.016),(2015,0.017),(2016,0.0089),(2017,0.016)))  
 (27)PPICLA = WITH LOOKUP (Time,([(2005,0)-(2020,1)],(2010,0.2785),(2011,0.3694),(2012,0.4283),(2013,0.4556),(2014,0.4551),(2015,0.4324),(2016,0.3936),(2017,0.3443)))  
 (28)RP=TP\*(100-UR)/100  
 (29)TLA= 22436.93  
 (30)TP= INTEG (PGQ,521.919)  
 (31)UP=TP\*UR/100  
 (32)UR= 14.476\*EXP(0.001\*GDP), GDP<650  
 UR= 27.424\*LN(GDP)-150.83, 650<GDP<2000  
 UR = 9.6679 ln(x) - 10.318, GDP>2000  
 (33) LALRPer = WITH LOOKUP (Time,([(0,0)-(3000,10)], (2010,0.37),(2011,0.38),(2012,0.39),(2013,0.39),(2014,0.40),(2015,0.41),(2016, 0.42),(2017, 0.43)))

### **Precision of System Dynamic Model**

Table S-2 Comparison of simulated and real values of some key variables

| Variables |                 | 2010    | 2011    | 2012    | 2013    | 2014    | 2015    | 2016    | 2017    |
|-----------|-----------------|---------|---------|---------|---------|---------|---------|---------|---------|
| TP        | Actual value    | 521.92  | 525.85  | 529.60  | 534.20  | 538.70  | 543.00  | 547.50  | 553.70  |
|           | Simulated value | 521.92  | 525.85  | 529.60  | 534.20  | 538.70  | 543.00  | 547.50  | 553.70  |
|           | Error%          | 0.00    | 0.00    | 0.00    | 0.00    | 0.00    | 0.00    | 0.00    | 0.00    |
| FAI       | Actual value    | 200.54  | 276.20  | 421.79  | 548.50  | 550.48  | 612.98  | 739.30  | 897.36  |
|           | Simulated value | 200.16  | 281.69  | 408.90  | 524.24  | 542.12  | 625.48  | 763.02  | 914.68  |
|           | Error%          | -0.19   | 1.99    | -3.06   | -4.42   | -1.52   | 2.04    | 3.21    | 1.93    |
| UR        | Actual value    | 21.03   | 22.60   | 25.04   | 26.21   | 27.50   | 29.19   | 31.49   | 33.38   |
|           | Simulated value | 21.15   | 22.86   | 24.88   | 26.33   | 27.13   | 28.45   | 30.62   | 33.01   |
|           | Error%          | 0.59    | 1.15    | -0.64   | 0.44    | -1.33   | -2.54   | -2.77   | -1.10   |
| GDP       | Actual value    | 379.64  | 465.03  | 555.60  | 611.27  | 669.51  | 708.38  | 765.53  | 830.62  |
|           | Simulated value | 379.21  | 456.87  | 541.56  | 598.03  | 658.07  | 690.41  | 747.28  | 815.43  |
|           | Error%          | -0.12   | -1.76   | -2.53   | -2.17   | -1.71   | -2.54   | -2.38   | -1.83   |
| GDPP      | Actual value    | 74.46   | 91.59   | 113.35  | 126.47  | 135.76  | 140.65  | 149.44  | 154.55  |
|           | Simulated value | 74.01   | 91.44   | 113.06  | 126.26  | 135.82  | 140.50  | 149.34  | 154.64  |
|           | Error%          | -0.60   | -0.17   | -0.26   | -0.17   | 0.04    | -0.11   | -0.06   | 0.06    |
| GDP_S     | Actual value    | 174.82  | 222.87  | 270.61  | 271.78  | 299.39  | 308.13  | 322.06  | 357.94  |
|           | Simulated value | 174.83  | 218.07  | 262.20  | 264.47  | 292.97  | 298.48  | 312.59  | 349.85  |
|           | Error%          | 0.01    | -2.16   | -3.11   | -2.69   | -2.15   | -3.13   | -2.94   | -2.26   |
| GDPT      | Actual value    | 130.37  | 150.56  | 171.64  | 213.02  | 234.36  | 259.60  | 294.04  | 318.13  |
|           | Simulated value | 130.37  | 147.35  | 166.30  | 207.31  | 229.29  | 251.43  | 285.35  | 310.94  |
|           | Error%          | 0.00    | -2.13   | -3.11   | -2.68   | -2.16   | -3.15   | -2.95   | -2.26   |
| LAPA      | Actual value    | 6016.95 | 6016.13 | 6013.79 | 6010.15 | 6005.09 | 5998.61 | 5990.76 | 5981.48 |
|           | Simulated value | 6016.95 | 6016.01 | 6013.95 | 6012.49 | 6009.58 | 6004.32 | 5997.70 | 5993.73 |
|           | Error%          | 0.00    | 0.00    | 0.00    | 0.04    | 0.07    | 0.10    | 0.12    | 0.20    |
| LAPI      | Actual value    | 15.74   | 21.36   | 25.87   | 29.27   | 31.55   | 32.73   | 32.79   | 31.75   |

---

|      |                 |          |          |          |          |          |          |          |          |
|------|-----------------|----------|----------|----------|----------|----------|----------|----------|----------|
|      | Simulated value | 15.74    | 20.91    | 25.07    | 28.48    | 30.88    | 31.71    | 31.83    | 31.03    |
|      | Error%          | 0.01     | -2.12    | -3.10    | -2.68    | -2.14    | -3.13    | -2.95    | -2.26    |
|      | Actual value    | 40.78    | 36.47    | 34.53    | 34.97    | 37.78    | 42.97    | 50.53    | 60.46    |
| LALU | Simulated value | 40.78    | 35.69    | 33.46    | 34.03    | 36.97    | 41.62    | 49.04    | 59.10    |
|      | Error%          | 0.00     | -2.13    | -3.11    | -2.68    | -2.15    | -3.14    | -2.95    | -2.26    |
|      | Actual value    | 153.89   | 154.33   | 154.87   | 155.52   | 156.26   | 157.10   | 158.04   | 159.08   |
| LALR | Simulated value | 154.09   | 154.40   | 154.83   | 155.65   | 155.86   | 156.54   | 157.56   | 158.74   |
|      | Error%          | 0.13     | 0.05     | -0.03    | 0.09     | -0.26    | -0.36    | -0.30    | -0.22    |
|      | Actual value    | 16212.64 | 16211.71 | 16210.93 | 16210.10 | 16209.31 | 16208.59 | 16207.87 | 16207.22 |
| LA_E | Simulated value | 16212.40 | 16213.00 | 16212.70 | 16209.30 | 16206.70 | 16205.80 | 16203.90 | 16197.40 |
|      | Error%          | 0.00     | 0.01     | 0.01     | 0.00     | -0.02    | -0.02    | -0.02    | -0.06    |
|      | Actual value    | 6032.69  | 6037.49  | 6039.66  | 6039.41  | 6036.65  | 6031.34  | 6023.56  | 6013.23  |
| LAP  | Simulated value | 6032.69  | 6036.91  | 6039.01  | 6040.97  | 6040.46  | 6036.02  | 6029.53  | 6024.76  |
|      | Error%          | 0.00     | -0.01    | -0.01    | 0.03     | 0.06     | 0.08     | 0.10     | 0.19     |
|      | Actual value    | 194.67   | 190.80   | 189.41   | 190.49   | 194.04   | 200.07   | 208.57   | 219.55   |
| LAL  | Simulated value | 194.87   | 190.10   | 188.29   | 189.68   | 192.83   | 198.16   | 206.60   | 217.84   |
|      | Error%          | 0.10     | -0.37    | -0.59    | -0.42    | -0.63    | -0.96    | -0.94    | -0.78    |
|      | Actual value    | 428.36   | 478.49   | 533.93   | 587.50   | 547.65   | 508.78   | 513.16   | 537.57   |
| TEC  | Simulated value | 427.75   | 470.11   | 520.44   | 574.71   | 538.30   | 495.85   | 500.90   | 527.75   |
|      | Error%          | -0.14    | -1.75    | -2.53    | -2.18    | -1.71    | -2.54    | -2.39    | -1.83    |
|      | Actual value    | 7.77     | 8.43     | 8.62     | 9.65     | 8.92     | 9.40     | 9.99     | 12.03    |
| TWC  | Simulated value | 7.78     | 8.32     | 8.54     | 9.32     | 9.26     | 9.44     | 10.01    | 11.71    |
|      | Error%          | 0.20     | -1.27    | -0.88    | -3.42    | 3.83     | 0.46     | 0.13     | -2.65    |

---

### Suitability Probability Calculation

The suitability probability of nine land classes in the PLE space was calculated by the ANN-based module in the FLUS model. The ANN used in the FLUS model is a multilayer neural network consisting of an input layer, an implicit layer, and an output layer. Input signals from multiple neurons are passed through connections with weights. The total input value received by the neuron is compared with the threshold of the neuron. The neuron's output is processed by an activation function if it is greater than the threshold. The activation function uses the sigmoid function with the following equation:

$$sp(p, k, t) = \sum_j \omega_{j,k} \times \text{sigmoid}(\text{net}_j(p, t)) \quad (1)$$

$sp(p, k, t)$  is the suitability probability of  $k$  types of land at time  $t$  and raster pixel  $p$ ;  $\omega_{j,k}$  is the weight between the output layer and hidden layer;  $\text{sigmoid}(\ )$  is the activation function from hidden layer to output layer;  $\text{net}_j(p, t)$  indicates the signal received by the  $j$  hidden layer at raster pixel  $p$  and time  $t$ . The total probability of suitability of each raster pixel output by the neural network algorithm is always 1.

$$\sum_k sq(p, k, t) = 1 \quad (2)$$

The ANN sampling mode to obtain training samples in the FLUS model is divided into uniform sampling and random sampling. In the uniform sampling mode, the number of sampling points for each type of land is the same. In the random sampling mode, the number of sampling points is related to the proportion of each site. In this paper, uniform sampling is chosen, and the sampling ratio is 0.1% of the effective pixels in the study area. According to experience, the number of hidden layers of the neural network is set to 14.

Based on the ANN suitability probability results, the accuracy can be evaluated by the RMSE and the AUC value associated with the ROC curve. Smaller RMSE values and larger AUC values indicate higher model accuracy.

### Simulation and Validation

Land-use conversion not only depends on the suitability probability output from the neural network but is also affected by factors such as neighbourhood density, inertia coefficient, conversion cost and land class competition. The integrated land-use conversion probability is calculated by the formula:

$$TProb_{p,k}^t = sp(p, k, t) \times \theta_{p,k}^t \times I_k^t \times (1 - sc_{c \rightarrow k}) \quad (3)$$

where  $TProb_{p,k}^t$  is the total probability after combining the influence of the above four aspects;  $\theta_{p,k}^t$  is the neighbourhood influence, and the calculation formula is shown in equation (4);  $I_k^t$  is the inertia coefficient in the adaptive process, and the calculation formula is shown in equations (5)-(7); and  $sc_{c \rightarrow k}$  is the cost of changing land type  $c$  to  $k$ . The costs of different types of conversion together form the cost matrix.

$$\theta_{p,k}^t = \frac{\sum_{N \times N} \text{con}(c_p^{t-1} = k)}{N \times N - 1} \times \omega_k \quad (4)$$

where  $\sum_{N \times N} \text{con}(c_p^{t-1} = k)$  represents the total number of raster pixels of land type  $k$  after the end of the last iteration in the Moore neighbourhood window of  $N \times N$ , and  $N=3$  in this paper;  $\omega_k$  is the neighbourhood weight of land type  $k$ .

The gap between current land quantity and future demand adaptively adjusts during the iterative process, determining the inertia factor for different types of sites. The adaptive inertia coefficient

$I_k^t$  at moment t for land type k is:

$$I_k^t = I_k^{t-1} \quad |D_k^{t-2}| \leq |D_k^{t-1}| \quad (5)$$

$$I_k^t = I_k^{t-1} \times \frac{D_k^{t-2}}{D_k^{t-1}} \quad 0 > D_k^{t-2} > D_k^{t-1} \quad (6)$$

$$I_k^t = I_k^{t-1} \times \frac{D_k^{t-1}}{D_k^{t-2}} \quad D_k^{t-1} > D_k^{t-2} > 0 \quad (7)$$

where  $D_k^{t-1}$  and  $D_k^{t-2}$  are the differences between the demands and actual patches in land type k at moments t-1 and t-2, respectively.

## Model Precision

### Suitability Probabilities based on ANN

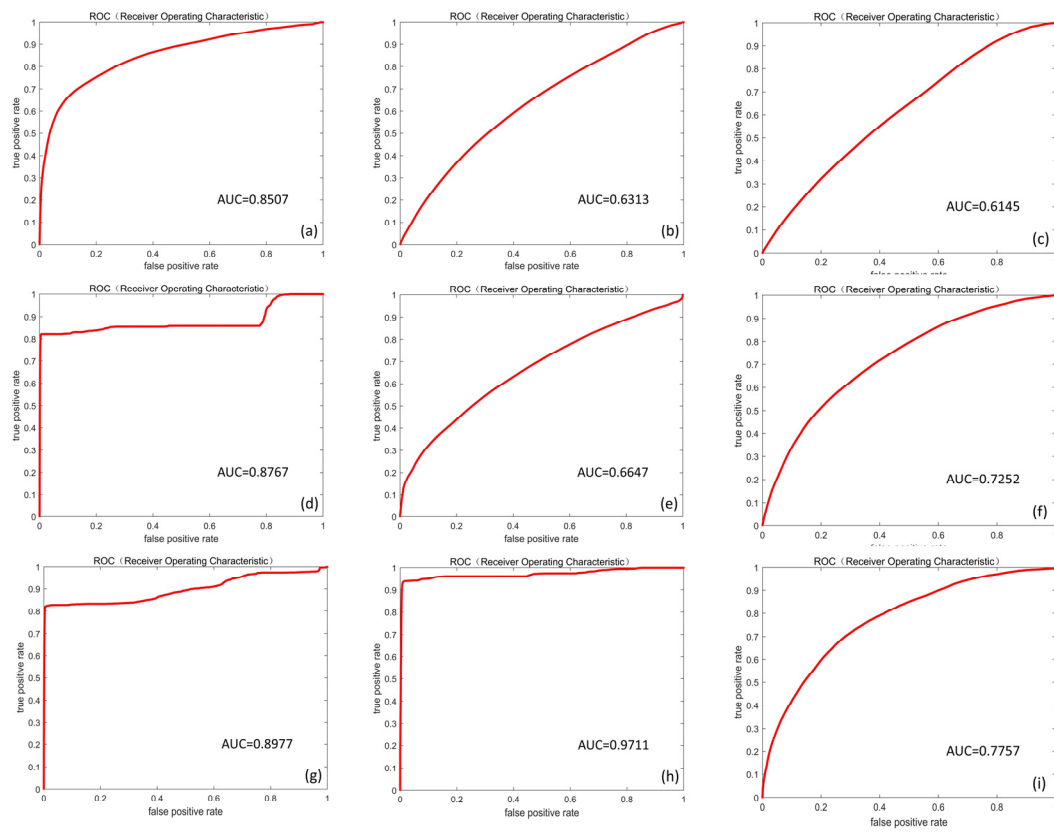

Figure S- 1 ROC curves and AUC values for 2010 suitability probability results based on ANN

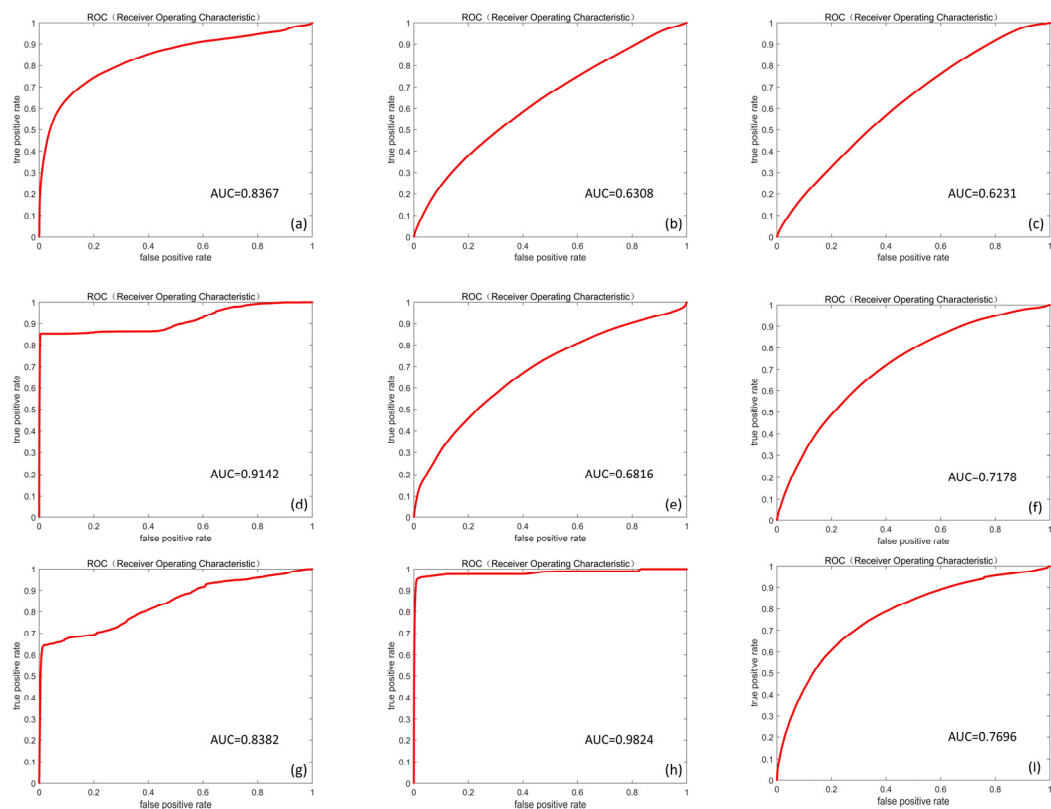

Figure S- 2 ROC curves and AUC values for 2015 suitability probability results based on ANN

### Accuracy of Spatial Simulation

Table S-3 Cost Matrix for the 2015 simulation using 2010 PLE spatial distribution data

|    | ER | EP | EG | EA | PP | PG | PI | LU | LR |
|----|----|----|----|----|----|----|----|----|----|
| ER | 1  | 1  | 1  | 0  | 1  | 1  | 0  | 0  | 0  |
| EP | 1  | 1  | 1  | 0  | 1  | 1  | 0  | 0  | 0  |
| EG | 0  | 1  | 1  | 0  | 0  | 0  | 0  | 0  | 1  |
| EA | 0  | 0  | 0  | 1  | 0  | 0  | 0  | 0  | 0  |
| PP | 0  | 1  | 1  | 0  | 1  | 1  | 0  | 0  | 0  |
| PG | 0  | 1  | 1  | 0  | 1  | 1  | 0  | 0  | 0  |
| PI | 1  | 1  | 1  | 0  | 1  | 1  | 1  | 1  | 0  |
| LU | 0  | 0  | 1  | 0  | 1  | 1  | 0  | 1  | 0  |
| LR | 0  | 1  | 1  | 0  | 1  | 1  | 0  | 0  | 1  |

**Note: 0 means that it cannot be converted into another lands, 1 means that it can be converted**

Table S-4 Cost Matrix for the 2015 simulation using 2010 PLE spatial distribution data

|    | ER | EP | EG | EA | PP | PG | PI | LU | LR |
|----|----|----|----|----|----|----|----|----|----|
| ER | 1  | 1  | 1  | 0  | 1  | 1  | 0  | 1  | 0  |
| EP | 1  | 1  | 1  | 1  | 1  | 1  | 1  | 0  | 1  |
| EG | 1  | 1  | 1  | 0  | 1  | 1  | 1  | 0  | 1  |
| EA | 1  | 1  | 1  | 1  | 0  | 0  | 0  | 1  | 0  |
| PP | 1  | 1  | 1  | 0  | 1  | 1  | 1  | 0  | 1  |







|    |   |   |   |   |   |   |   |   |   |
|----|---|---|---|---|---|---|---|---|---|
| LU | 0 | 0 | 0 | 0 | 0 | 0 | 0 | 1 | 0 |
| LR | 1 | 1 | 1 | 1 | 1 | 1 | 1 | 1 | 1 |

Table S-12 Cost Matrix for Scenario C1 and C2

|    | ER | EP | EG | EA | PP | PG | PI | LU | LR |
|----|----|----|----|----|----|----|----|----|----|
| ER | 1  | 0  | 0  | 0  | 0  | 0  | 0  | 0  | 0  |
| EP | 0  | 1  | 0  | 0  | 0  | 0  | 0  | 0  | 0  |
| EG | 1  | 1  | 1  | 1  | 1  | 1  | 1  | 1  | 1  |
| EA | 1  | 1  | 1  | 1  | 1  | 1  | 1  | 1  | 1  |
| PP | 0  | 0  | 0  | 0  | 1  | 0  | 0  | 0  | 0  |
| PG | 1  | 1  | 1  | 1  | 1  | 1  | 1  | 1  | 1  |
| PI | 1  | 1  | 1  | 1  | 1  | 1  | 1  | 1  | 1  |
| LU | 0  | 0  | 0  | 0  | 0  | 0  | 0  | 1  | 0  |
| LR | 1  | 1  | 1  | 1  | 1  | 1  | 1  | 1  | 1  |

Table S-13 Cost Matrix for Scenario C3

|    | ER | EP | EG | EA | PP | PG | PI | LU | LR |
|----|----|----|----|----|----|----|----|----|----|
| ER | 1  | 1  | 1  | 1  | 1  | 1  | 1  | 1  | 1  |
| EP | 0  | 1  | 0  | 0  | 0  | 0  | 0  | 0  | 0  |
| EG | 1  | 1  | 1  | 1  | 1  | 1  | 1  | 1  | 1  |
| EA | 1  | 1  | 1  | 1  | 1  | 1  | 1  | 1  | 1  |
| PP | 0  | 0  | 0  | 0  | 1  | 0  | 0  | 0  | 0  |
| PG | 1  | 1  | 1  | 1  | 1  | 1  | 1  | 1  | 1  |
| PI | 1  | 1  | 1  | 1  | 1  | 1  | 1  | 1  | 1  |
| LU | 0  | 0  | 0  | 0  | 0  | 0  | 0  | 1  | 0  |
| LR | 1  | 1  | 1  | 1  | 1  | 1  | 1  | 1  | 1  |

## Results

### Spatiotemporal pattern analysis

Table S- 14 Ratio of land area for production, living and ecological space in 2010, 2015, and 2018

| Year             | 2010                       |                   | 2015                       |                   | 2018                       |                   |
|------------------|----------------------------|-------------------|----------------------------|-------------------|----------------------------|-------------------|
| PLE Space        | Area<br>(km <sup>2</sup> ) | Percentage<br>(%) | Area<br>(km <sup>2</sup> ) | Percentage<br>(%) | Area<br>(km <sup>2</sup> ) | Percentage<br>(%) |
| Ecological Space | 16210.36                   | 72.25             | 16206.31                   | 72.23             | 16203.87                   | 72.22             |
| Production Space | 6031.90                    | 26.88             | 6030.55                    | 26.88             | 6000.09                    | 26.74             |
| Living Space     | 194.67                     | 0.87              | 200.07                     | 0.89              | 232.97                     | 1.04              |
| Total            | 22436.93                   | 100.00            | 22436.93                   | 100.00            | 22436.93                   | 100.00            |

Table S-15 Land area and percentage of 9 subclasses in PLE space in 2010, 2015, and 2018

|           | 2010                       |                   | 2015                       |                   | 2018                       |                   |
|-----------|----------------------------|-------------------|----------------------------|-------------------|----------------------------|-------------------|
| PLE space | Area<br>(km <sup>2</sup> ) | Percentage<br>(%) | Area<br>(km <sup>2</sup> ) | Percentage<br>(%) | Area<br>(km <sup>2</sup> ) | Percentage<br>(%) |
| ER        | 1442.06                    | 6.43              | 1453.9                     | 6.48              | 1481.17                    | 6.60              |

|       |          |       |          |       |          |       |
|-------|----------|-------|----------|-------|----------|-------|
| EP    | 7028.53  | 31.33 | 7018.83  | 31.28 | 7000.82  | 31.20 |
| EG    | 7726.74  | 34.44 | 7720.56  | 34.41 | 7710.14  | 34.36 |
| EA    | 13.03    | 0.06  | 13.03    | 0.06  | 11.74    | 0.05  |
| PP    | 3166.14  | 14.11 | 3442.69  | 15.34 | 3218.38  | 14.34 |
| PG    | 2850.02  | 12.70 | 2555.13  | 11.39 | 2752.14  | 12.27 |
| PI    | 15.74    | 0.07  | 32.73    | 0.15  | 29.57    | 0.13  |
| LU    | 40.78    | 0.18  | 42.96    | 0.19  | 72.76    | 0.32  |
| LR    | 153.89   | 0.69  | 157.1    | 0.70  | 160.21   | 0.71  |
| Total | 22436.93 | 100   | 22436.93 | 100   | 22436.93 | 100   |

Table S-16 Land-use transition matrix from 2010 to 2015

|               | ER      | EP      | EG      | EA    | PP      | PG      | PI    | LU    | LR     | 2015<br>Total |
|---------------|---------|---------|---------|-------|---------|---------|-------|-------|--------|---------------|
| ER            | 1441.91 | 5.91    | 2.7     | 0     | 2.28    | 1.1     | 0     | 0     | 0      | 1453.9        |
| EP            | 0.03    | 7016.88 | 1.29    | 0     | 0.37    | 0.25    | 0     | 0     | 0      | 7018.82       |
| EG            | 0       | 0.02    | 7720.42 | 0     | 0       | 0       | 0     | 0     | 0.11   | 7720.55       |
| EA            | 0       | 0       | 0       | 13.03 | 0       | 0       | 0     | 0     | 0      | 13.03         |
| PP            | 0       | 0.06    | 0.02    | 0     | 2659.35 | 783.26  | 0     | 0     | 0      | 3442.69       |
| PG            | 0       | 0.42    | 0.06    | 0     | 491.92  | 2062.73 | 0     | 0     | 0      | 2555.13       |
| PI            | 0.13    | 4.96    | 1.74    | 0     | 8.69    | 1.48    | 15.74 | 0.01  | 0      | 32.75         |
| LU            | 0       | 0       | 0.22    | 0     | 1.47    | 0.51    | 0     | 40.77 | 0      | 42.97         |
| LR            | 0       | 0.28    | 0.29    | 0     | 2.05    | 0.69    | 0     | 0     | 153.78 | 157.09        |
| 2010<br>Total | 1442.07 | 7028.53 | 7726.74 | 13.03 | 3166.13 | 2850.02 | 15.74 | 40.78 | 153.89 | 22436.93      |

Table S-17 Land-use transition matrix from 2015 to 2018

| Area<br>(km <sup>2</sup> ) | ER      | EP      | EG      | EA    | PP      | PG      | PI    | LU    | LR     | Total of<br>2018 |
|----------------------------|---------|---------|---------|-------|---------|---------|-------|-------|--------|------------------|
| ER                         | 1435.43 | 15.04   | 11.80   | 0     | 12.55   | 6.13    | 0.02  | 0.04  | 0.15   | 1481.16          |
| EP                         | 2.64    | 6576.75 | 222.74  | 0.56  | 102.93  | 88.16   | 1.27  | 0.36  | 5.41   | 7000.82          |
| EG                         | 1.78    | 230.46  | 7220.44 | 0.29  | 134.50  | 116.53  | 0.53  | 0.31  | 5.30   | 7710.14          |
| EA                         | 0.08    | 0.55    | 0.32    | 10.36 | 0.34    | 0.11    | 0     | 0     | 0      | 11.74            |
| PP                         | 11.37   | 99.14   | 124.22  | 0.37  | 2646.69 | 322.83  | 1.77  | 1.41  | 10.57  | 3218.38          |
| PG                         | 0.78    | 85.20   | 132.87  | 1.44  | 513.09  | 2008.40 | 0.37  | 0.25  | 9.74   | 2752.13          |
| PI                         | 0.47    | 4.15    | 1.96    | 0     | 4.68    | 2.10    | 16.07 | 0.03  | 0.12   | 29.57            |
| LU                         | 0.87    | 1.56    | 0.42    | 0     | 16.74   | 1.52    | 12.36 | 38.87 | 0.41   | 72.76            |
| LR                         | 0.49    | 5.97    | 5.77    | 0     | 11.18   | 9.36    | 0.34  | 1.68  | 125.40 | 160.21           |
| Total of<br>2015           | 1453.90 | 7018.83 | 7720.55 | 13.03 | 3442.69 | 2555.13 | 32.73 | 42.97 | 157.10 | 22436.92         |

#### Results of Multi-Scenarios

##### Future demand

Table S-18 Projections of the economy and population under different scenarios in 2030

| Scenarios | GDP     | Total population | Urbanization rate | GDP per capita |
|-----------|---------|------------------|-------------------|----------------|
| Planning  | 4100.00 | 615.00           | 55.00             | 6.70           |

---

|        |         |        |       |      |
|--------|---------|--------|-------|------|
| target |         |        |       |      |
| BS     | 3405.08 | 624.57 | 68.33 | 5.45 |
| A1     | 4614.44 | 642.44 | 71.27 | 7.18 |
| A2     | 3724.54 | 630.16 | 69.19 | 5.91 |
| A3     | 3114.25 | 618.10 | 67.46 | 5.04 |
| B1     | 4602.20 | 642.44 | 71.24 | 7.16 |
| B2     | 3714.87 | 630.16 | 69.17 | 5.90 |
| B3     | 3105.14 | 618.10 | 67.43 | 5.02 |
| C1     | 4602.20 | 642.44 | 71.24 | 7.16 |
| C2     | 3714.87 | 630.16 | 69.17 | 5.90 |
| C3     | 3105.14 | 618.10 | 67.43 | 5.02 |

---

## Spatial optimization

Table S-19 Difference between future demand and allocated values for different scenarios

|    |             | ER      | EP      | EG      | EA    | PP      | PG      | PI     | LU     | LR     |
|----|-------------|---------|---------|---------|-------|---------|---------|--------|--------|--------|
|    | Demand      | 1625862 | 7712021 | 8491467 | 12913 | 3292757 | 2815742 | 155301 | 175127 | 116159 |
| BS | Allocation  | 1616891 | 7712021 | 8491467 | 12913 | 3292757 | 2815742 | 120154 | 175127 | 160277 |
|    | Difference% | -0.55   | 0.00    | 0.00    | 0.00  | 0.00    | 0.00    | -22.63 | 0.00   | 37.98  |
|    | Demand      | 1605507 | 7502478 | 8260746 | 12562 | 3499585 | 2992607 | 109825 | 233379 | 180660 |
| A1 | Allocation  | 1605507 | 7502478 | 8303348 | 12562 | 3499585 | 3009208 | 109825 | 174176 | 180660 |
|    | Difference% | 0.00    | 0.00    | 0.52    | 0.00  | 0.00    | 0.55    | 0.00   | -25.37 | 0.00   |
|    | Demand      | 1605507 | 7517681 | 8277486 | 12587 | 3498279 | 2994861 | 119142 | 213486 | 158320 |
| A2 | Allocation  | 1605507 | 7517898 | 8302920 | 12587 | 3498279 | 2994861 | 119140 | 187837 | 158320 |
|    | Difference% | 0.00    | 0.00    | 0.31    | 0.00  | 0.00    | 0.00    | 0.00   | -12.01 | 0.00   |
|    | Demand      | 1594955 | 7538630 | 8302441 | 12641 | 3498279 | 2994861 | 132419 | 191913 | 131210 |
| A3 | Allocation  | 1594961 | 7538637 | 8302442 | 12641 | 3498279 | 2994861 | 132418 | 190768 | 132342 |
|    | Difference% | 0.00    | 0.00    | 0.00    | 0.00  | 0.00    | 0.00    | 0.00   | -0.60  | 0.86   |
|    | Demand      | 1605507 | 7615472 | 8384894 | 12751 | 3371607 | 2883170 | 109801 | 233327 | 180820 |
| B1 | Allocation  | 1605507 | 7615472 | 8384894 | 12751 | 3371607 | 2934836 | 109801 | 181661 | 180820 |
|    | Difference% | 0.00    | 0.00    | 0.00    | 0.00  | 0.00    | 1.79    | 0.00   | -22.14 | 0.00   |
|    | Demand      | 1605507 | 7628344 | 8399333 | 12773 | 3374127 | 2885324 | 120057 | 213435 | 158449 |
| B2 | Allocation  | 1605507 | 7628344 | 8399333 | 12773 | 3374127 | 2923422 | 97049  | 194338 | 162456 |
|    | Difference% | 0.00    | 0.00    | 0.00    | 0.00  | 0.00    | 1.32    | -19.16 | -8.95  | 2.53   |
|    | Demand      | 1619516 | 7654718 | 8430291 | 12837 | 3354736 | 2878482 | 117840 | 164066 | 164863 |
| B3 | Allocation  | 1619516 | 7654718 | 8430291 | 12837 | 3354736 | 2905995 | 90327  | 164066 | 164863 |
|    | Difference% | 0.00    | 0.00    | 0.00    | 0.00  | 0.00    | 0.96    | -23.35 | 0.00   | 0.00   |
|    | Demand      | 1605507 | 7615472 | 8384894 | 12751 | 3498279 | 2756498 | 109801 | 233327 | 180820 |
| C1 | Allocation  | 1605507 | 7615472 | 8384894 | 12751 | 3498279 | 2965739 | 29418  | 104468 | 180821 |
|    | Difference% | 0.00    | 0.00    | 0.00    | 0.00  | 0.00    | 7.59    | -73.21 | -55.23 | 0.00   |
|    | Demand      | 1605507 | 7628344 | 8399333 | 12773 | 3498279 | 2761172 | 120057 | 213435 | 158449 |
| C2 | Allocation  | 1605507 | 7628344 | 8399333 | 12773 | 3498279 | 2950662 | 31375  | 111015 | 160061 |
|    | Difference% | 0.00    | 0.00    | 0.00    | 0.00  | 0.00    | 6.86    | -73.87 | -47.99 | 1.02   |
|    | Demand      | 1619516 | 7654718 | 8430291 | 12837 | 3498279 | 2725199 | 133325 | 191859 | 131325 |
| C3 | Allocation  | 1619516 | 7654718 | 8430291 | 12837 | 3498279 | 2885302 | 30293  | 110898 | 155215 |
|    | Difference% | 0.00    | 0.00    | 0.00    | 0.00  | 0.00    | 5.87    | -77.28 | -42.20 | 18.19  |
